# Supplementary material for: Controlling ion transport in a C2N-based nanochannel with tunable interlayer spacing
Source: Royal Society of Chemistry journal article supplement (doi:10.1039/d0cp02993a), 2020-01-01
Supplement: d0cp02993a1.pdf [file d0cp02993a1.pdf]

# Supporting information for Control the ion transport in a $C_2N$ -based nanochannel with tunable interlayer spacing

You-sheng Yu<sup>a,d</sup>, Rong-ri Tan<sup>\*c</sup>, and Hong-ming Ding<sup>†b</sup>

<sup>a</sup>School of Science, East China University of Technology, Nanchang 330013, China.

<sup>b</sup>Center for Soft Condensed Matter Physics and Interdisciplinary Research, Soochow University, Suzhou 215006, China.

<sup>c</sup>Department of Physics, Jiangxi Science & Technology Normal University, Nanchang 330013, China.

<sup>d</sup>School of Science, Kaili University, Kaili 556011, China.

## Contents

|          |                                                                                                         |          |
|----------|---------------------------------------------------------------------------------------------------------|----------|
| <b>1</b> | <b>The details of simulation systems</b>                                                                | <b>2</b> |
| <b>2</b> | <b>The force field parameters</b>                                                                       | <b>3</b> |
| <b>3</b> | <b>The dehydration free energy</b>                                                                      | <b>3</b> |
| <b>4</b> | <b>The number of water molecules, anion and nitrogen atom in the first coordination shell of cation</b> | <b>4</b> |
| <b>5</b> | <b>The concentration of ions outside the nanochannel</b>                                                | <b>5</b> |

---

\*rogertanr@hotmail.com

†dinghm@suda.edu.cn

# 1 The details of simulation systems

Table S1: The number of atom in the simulation systems.

| d/nm | Concentration | Water molecules | Cation ( $K^+$ , $Na^+$ or $Li^+$ ) | Anion ( $Cl^-$ ) |
|------|---------------|-----------------|-------------------------------------|------------------|
| 0.6  | 0.5           | 3485            | 53                                  | 53               |
| 0.7  | 0.5           | 3625            | 54                                  | 54               |
| 0.8  | 0.5           | 3738            | 55                                  | 55               |
| 1.0  | 0.5           | 3917            | 57                                  | 57               |
| 1.2  | 0.5           | 4117            | 59                                  | 59               |
| 1.4  | 0.5           | 4322            | 61                                  | 61               |
| 1.6  | 0.5           | 4575            | 63                                  | 63               |
| 0.7  | 0.1           | 3711            | 11                                  | 11               |
| 0.7  | 0.3           | 3669            | 32                                  | 32               |
| 0.7  | 0.7           | 3581            | 76                                  | 76               |
| 0.7  | 1.0           | 3517            | 108                                 | 108              |
| 1.0  | 0.1           | 4009            | 11                                  | 11               |
| 1.0  | 0.3           | 3963            | 34                                  | 34               |
| 1.0  | 0.7           | 3871            | 80                                  | 80               |
| 1.0  | 1.0           | 3803            | 114                                 | 114              |
| 1.4  | 0.1           | 4420            | 12                                  | 12               |
| 1.4  | 0.3           | 4370            | 37                                  | 37               |
| 1.4  | 0.7           | 4272            | 86                                  | 86               |
| 1.4  | 1.0           | 4200            | 122                                 | 122              |

## 2 The force field parameters

Table S2: The Lennard Jones and force field parameters adopted in this work.

| Atom             | $\sigma/\text{nm}$ | $\epsilon/\text{kJ mol}^{-1}$ | q/e    | Ref. |
|------------------|--------------------|-------------------------------|--------|------|
| Li <sup>+</sup>  | 0.202590           | $7.65672 \times 10^{-2}$      | 1.0    | [1]  |
| Na <sup>+</sup>  | 0.332840           | $1.15897 \times 10^{-2}$      | 1.0    | [1]  |
| K <sup>+</sup>   | 0.472302           | $1.37235 \times 10^{-3}$      | 1.0    | [1]  |
| Cl <sup>-</sup>  | 0.440104           | $4.18400 \times 10^{-1}$      | -1.0   | [1]  |
| O <sub>w</sub>   | 0.315061           | $6.36386 \times 10^{-1}$      | -0.834 | [2]  |
| H <sub>w</sub>   | 0                  | 0                             | 0.417  | [2]  |
| C <sub>gra</sub> | 0.339967           | $3.59824 \times 10^{-1}$      | 0      | [3]  |
| C <sub>c2n</sub> | 0.339967           | $3.59824 \times 10^{-1}$      | 0.24   | [4]  |
| N <sub>c2n</sub> | 0.325000           | $7.11280 \times 10^{-1}$      | -0.48  | [4]  |

| Bond type                                                       | length/nm |
|-----------------------------------------------------------------|-----------|
| C <sub>c2n</sub> -C <sub>c2n</sub> (involved in pyrazine)       | 0.143     |
| C <sub>c2n</sub> -C <sub>c2n</sub> (presented in benzene rings) | 0.147     |
| C <sub>c2n</sub> -N <sub>c2n</sub>                              | 0.134     |
| C <sub>gra</sub> -C <sub>gra</sub>                              | 0.142     |

| Angle type                                           | angle/degree |
|------------------------------------------------------|--------------|
| C <sub>c2n</sub> -C <sub>c2n</sub> -C <sub>c2n</sub> | 120          |
| C <sub>c2n</sub> -N <sub>c2n</sub> -C <sub>c2n</sub> | 120          |
| N <sub>c2n</sub> -C <sub>c2n</sub> -C <sub>c2n</sub> | 120          |
| C <sub>gra</sub> -C <sub>gra</sub> -C <sub>gra</sub> | 120          |

## 3 The dehydration free energy

Table S3: The dehydration free energy of alkali ion in the bulk solution, the water model is TIP3P.

|                  | Li <sup>+</sup> /kCal mol <sup>-1</sup> | Na <sup>+</sup> /kCal mol <sup>-1</sup> | K <sup>+</sup> /kCal mol <sup>-1</sup> |
|------------------|-----------------------------------------|-----------------------------------------|----------------------------------------|
| This work        | 109.1                                   | 83.9                                    | 66.5                                   |
| Joung's work[5]  | 113.7                                   | 88.7                                    | 70.7                                   |
| Åqvist's work[6] | 109.5                                   | 84.2                                    | 67.0                                   |

## 4 The number of water molecules, anion and nitrogen atom in the first coordination shell of cation

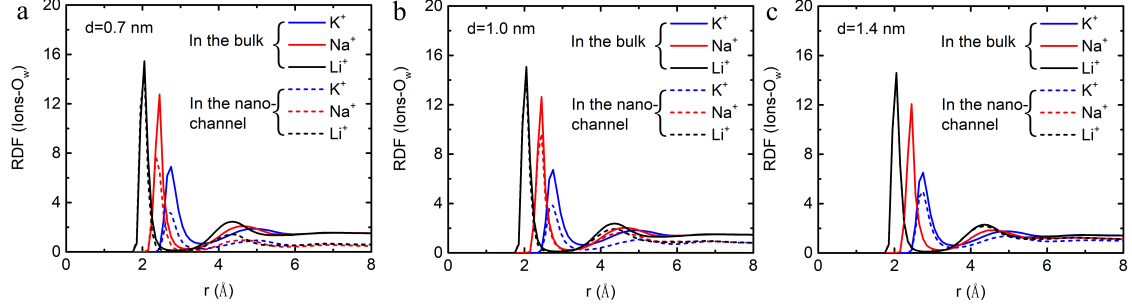

Figure S1: The radial distribution function of water molecules around  $K^+$ ,  $Na^+$  and  $Li^+$  ions at  $d=0.7$  nm (a),  $1.0$  nm (b) and  $1.4$  nm (c). The solid and dashed lines represent the case of the alkali ion in the bulk and the nanochannel, respectively. The first peak position from the center of  $K^+$ ,  $Na^+$  and  $Li^+$  ions are in good agreement with the previous work.[7, 8]

The hydration diameter could be defined as [9]

$$D_{hd}^3 = \frac{6}{\pi} v_w h + D_{eff}^3 \quad (1)$$

where  $D_{hd}$  is the hydration diameter,  $v_w$  ( $v_w=2.991 \times 10^{-29}$  m<sup>3</sup>) is the volume of a water molecule,  $h$  is the hydration factor and  $D_{eff}$  is the effective ionic diameter defined as the double difference between the peak position of radial distribution function and the effective radius of a water molecule (0.138 nm). The results is shown in the Table S4, which is good agreement with that of the previous work.

Table S4: The hydration diameter of cations

|                   | $Li^+$ /nm | $Na^+$ /nm | $K^+$ /nm |
|-------------------|------------|------------|-----------|
| This work         | 0.79       | 0.72       | 0.63      |
| Previous work[10] | 0.76       | 0.72       | 0.66      |

Table S5: The number of oxygen in water,  $\text{Cl}^-$  and nitrogen in the  $\text{C}_2\text{N}$  membrane within the first coordination shell of alkali ions in the bulk and in the nanochannel, respectively. The radius of the first coordination shell was defined at first minima in the radial distribution function.

| d/nm | Ion           | In the bulk       |                    | In the nanochannel |                    |       |
|------|---------------|-------------------|--------------------|--------------------|--------------------|-------|
|      |               | Ion- $\text{O}_w$ | Ion- $\text{Cl}^-$ | Ion- $\text{O}_w$  | Ion- $\text{Cl}^-$ | Ion-N |
| 0.7  | $\text{Li}^+$ | 4.3               | 0.2                | 3.8                | 0.2                | 0.6   |
|      | $\text{Na}^+$ | 5.5               | 0.2                | 3.5                | 0.2                | 1.2   |
|      | $\text{K}^+$  | 6.5               | 0.3                | 2.8                | 0.1                | 4.7   |
| 1.0  | $\text{Li}^+$ | 4.3               | 0.2                | 3.9                | 0.2                | 0.2   |
|      | $\text{Na}^+$ | 5.5               | 0.2                | 4.4                | 0.6                | 0.6   |
|      | $\text{K}^+$  | 6.5               | 0.3                | 3.5                | 0.1                | 3.8   |
| 1.4  | $\text{Li}^+$ | 4.3               | 0.2                | 4.3                | 0.2                | 0.2   |
|      | $\text{Na}^+$ | 5.5               | 0.2                | 5.4                | 0.2                | 0.2   |
|      | $\text{K}^+$  | 6.5               | 0.3                | 4.9                | 0.1                | 3.3   |

## 5 The concentration of ions outside the nanochannel

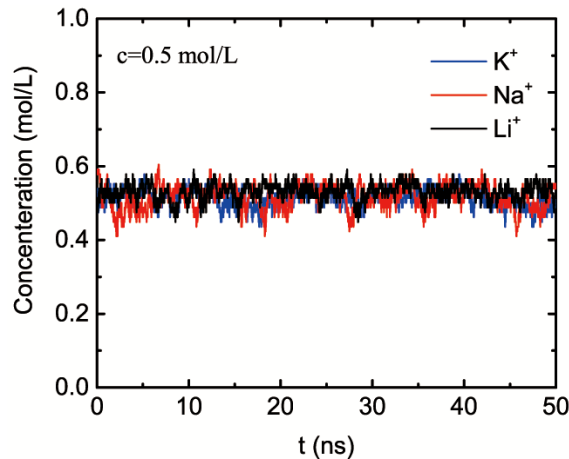

Figure S2: The concentration of ions outside the nanochannel as a function of simulated time at  $d=1.4$  nm.

## References

- [1] Alan A Chen and Rohit V Pappu. Parameters of monovalent ions in the amber-99 forcefield: Assessment of inaccuracies and proposed improvements. *J. Phys. Chem. B*, 111(41):11884–11887, 2007.
- [2] Christopher I. Bayly Ian R. Gould Kenneth M. Merz David M. Ferguson

- David C. Spellmeyer Thomas Fox James W. Caldwell Wendy D. Cornell, Piotr Cieplak and Peter A. Kollman. A second generation force field for the simulation of proteins, nucleic acids, and organic molecules. *J. Am. Chem. Soc.*, 117(19):5179–5197, 1995.
- [3] M Dahanayaka, B. Liu, Z. Hu, Q. X. Pei, Z. Chen, A. W. Law, and K. Zhou. Graphene membranes with nanoslits for seawater desalination via forward osmosis. *Phys. Chem. Chem. Phys.*, 19(45):30551–30561, 2017.
- [4] Baoyu Li, Weifeng Li, Jose Manuel Perez-Aguilar, and Ruhong Zhou. Mild binding of protein to c2n monolayer reveals its suitable biocompatibility. *Small*, 13(12):1603685, 2017. 1603685.
- [5] In Suk Joung and Thomas E. Cheatham. Determination of alkali and halide monovalent ion parameters for use in explicitly solvated biomolecular simulations. *J. Phys. Chem. B*, 112:9020–9041, 2008.
- [6] Johan Åqvist. Ion-water interaction potentials derived from free energy perturbation simulations. *J. Phys. Chem.*, 94:8021–8024, 1990.
- [7] Xiang Liu Xuejiao Hu Bo Chen, Haifeng Jiang. Molecular insight into water desalination across multilayer graphene oxide membranes. *ACS Appl. Mater. Interfaces*, 9:22826–22836, 2017.
- [8] Yumeng Zhang Qingwei Gao Xiaohua Lu Yang Ruan, Yudan Zhu and Linghong Lu. Molecular dynamics study of mg<sup>2+</sup>/li<sup>+</sup> separation via biomimetic graphene-based nanopores: The role of dehydration in second shell. *Langmuir*, 32:13778–13786, 2016.
- [9] Yanru Wang Jun Shi Jian Zhou, Xiaohua Lu. Molecular dynamics study on ionic hydration. *Fluid Phase Equilib.*, 194(4):257–270, 2002.
- [10] H. Zhang, J. Hou, Y. Hu, P. Wang, R. Ou, L. Jiang, J. Z. Liu, B. D. Freeman, A. J. Hill, and H. Wang. Ultrafast selective transport of alkali metal ions in metal organic frameworks with subnanometer pores. *Sci. Adv.*, 4(2):eaag0066, 2018.
